# Supplementary material for: Humoral protection to SARS-CoV2 declines faster in patients on TNF alpha blocking therapies
Source: PubMed Central journal article supplement — RMD Open. 2021 Dec 7;7(3):e002008. doi: 10.1136/rmdopen-2021-002008 (PMC8655347; doi:10.1136/rmdopen-2021-002008), 2021-12-07
Supplement: rmdopen-2021-002008supp001.pdf [file rmdopen-2021-002008supp001.pdf]

## Supplement 1: Demographics of patient cohort

| Sex | Age (y) | Inflammatory disease         | biological DMARD   | conventional DMARD | Steroids            |
|-----|---------|------------------------------|--------------------|--------------------|---------------------|
| f   | 43      | Psoriatic Arthritis          | Golimumab          | Leflunomide        | 5 mg Prednisolone   |
| f   | 35      | Psoriatic Arthritis          | Certolizumab pegol | -                  | -                   |
| f   | 43      | Rheumatoid Arthritis         | Certolizumab pegol | -                  | 5 mg Prednisolone   |
| m   | 46      | MCTD                         | -                  | Hydroxychloroquine | -                   |
| f   | 39      | Rheumatoid Arthritis         | Etanercept         | Leflunomide        | -                   |
| f   | 51      | Rheumatoid Arthritis         | -                  | Sulfasalazine      | -                   |
| f   | 65      | Spondyloarthropathy          | Infliximab         | -                  | -                   |
| m   | 38      | Spondyloarthropathy          | Etanercept         | -                  | -                   |
| f   | 45      | Sarcoidosis                  | Infliximab         | -                  | 15 mg Prednisolone  |
| f   | 33      | Rheumatoid Arthritis         | Certolizumab pegol | -                  | -                   |
| f   | 47      | Psoriasis                    | Ixekizumab         | -                  | -                   |
| m   | 83      | Rheumatoid Arthritis         | Etanercept         | -                  | 2.5 mg Prednisolone |
| m   | 38      | Crohn's disease              | Vedolizumab        | -                  | -                   |
| f   | 53      | Rheumatoid Arthritis         | -                  | Leflunomide        | 7 mg Prednisolone   |
| f   | 24      | Systemic lupus erythematosus | -                  | Hydroxychloroquine | -                   |
| m   | 42      | Psoriasis                    | Adalimumab         | -                  | -                   |
| f   | 54      | Rheumatoid Arthritis         | Adalimumab         | -                  | -                   |
| m   | 58      | Spondyloarthropathy          | Secukinumab        | -                  | -                   |
| f   | 51      | Psoriasis                    | Secukinumab        | -                  | -                   |
| f   | 53      | Crohn's disease              | Infliximab         | -                  | -                   |
| m   | 61      | Psoriasis                    | Ustekinumab        | -                  | -                   |
| m   | 36      | Systemic lupus erythematosus | Belimumab          | Hydroxychloroquine | -                   |
| f   | 89      | Myositis                     | -                  | -                  | 2.5 mg Prednisolone |
