# Supplementary figures and images for: Humoral protection to SARS-CoV2 declines faster in patients on TNF alpha blocking therapies
Source: PubMed Central journal article supplement — RMD Open. 2021 Dec 7;7(3):e002008. doi: 10.1136/rmdopen-2021-002008 (PMC8655347; doi:10.1136/rmdopen-2021-002008), 2021-12-07

## Supplement

2 A

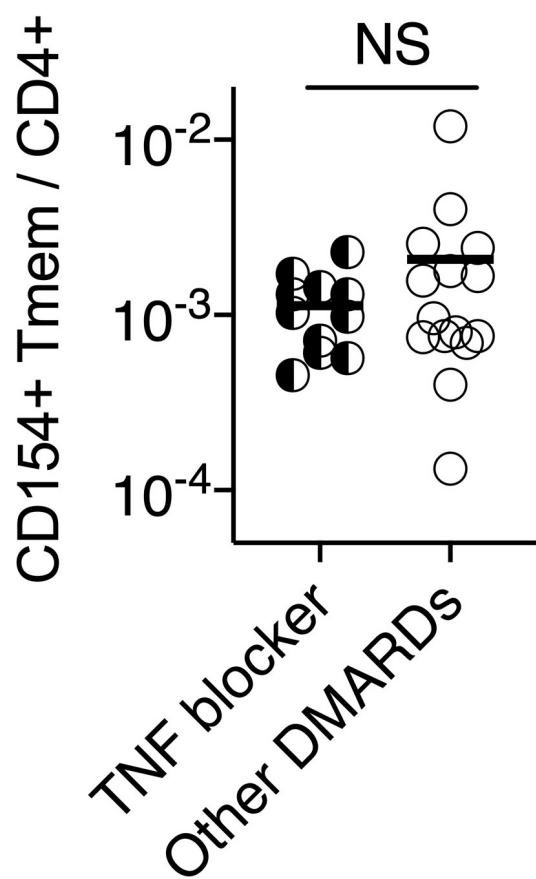

B

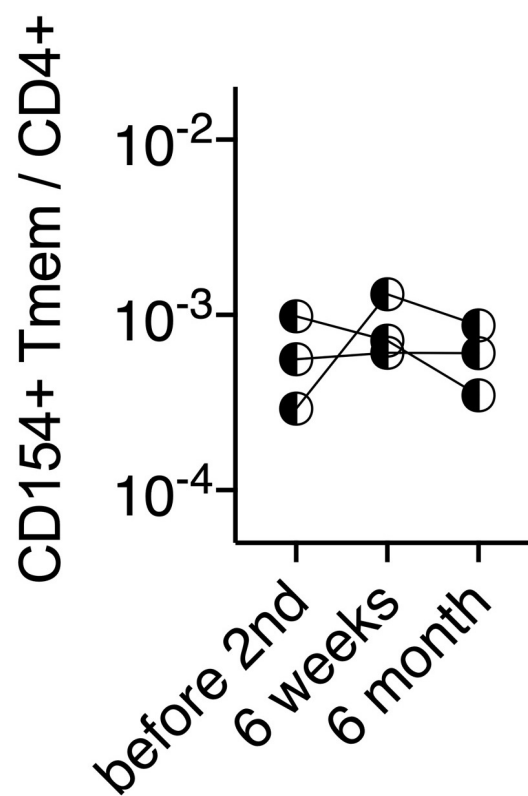

Supplement: rmdopen-2021-002008supp002.pdf [file rmdopen-2021-002008supp002.pdf]
